# Supplementary material
Source: publisher figshare collection journal article supplement (https://frontiersin.figshare.com/ndownloader/files/31413973)
Supplement: Supplementary file 1 [file 31413973]

**SUPPLEMENTARY INFORMATION**

**Table S1 –** List of the scientific names of all the species/taxa included in the study.

| **Taxa list used in the online questionnaire** |
| --- |
| *Anthias anthias* |
| *Boops boops* |
| *Conger conger* |
| *Coryphaena hippurus* |
| *Dentex spp.* |
| *Dicentrarchus spp.* |
| *Diplodus spp.* |
| *Epinephelus spp.* |
| *Labridae* |
| *Lithognatus mormyrus* |
| *Loligo vulgaris* |
| *Mugilidae* |
| *Mullus spp.* |
| *Oblada melanura* |
| *Octopus vulgaris* |
| *Pagellus spp.* |
| *Pagrus spp.* |
| *Paracentrotus lividus* |
| *Phycis phycis* |
| *Pleuronectiformes* |
| *Pomatomus saltatrix* |
| *Rays, skates and quimaeras* |
| *Sarda sarda* |
| *Sarpa salpa* |
| *Sciaena umbra* |
| *Scomber spp.* |
| *Scorpaenidae* |
| *Sepia officinalis* |
| *Seriola dumerili* |
| *Serranus spp.* |
| *Sparus aurata* |
| *Spicara spp.* |
| *Sphyraena spp.* |
| *Sharks* |
| *Thunnus alalunga* |
| *Thunnus thynnus* |
| *Trachinotus ovatus* |
| *Trachinus spp.* |
| *Trachurus spp.* |
| *Xiphias gladius* |
| *Xyrichtis novacula* |
| *Zeus faber* |

**Table S2 –** Survey types done in each zone for each season; they include port surveys (P), boat surveys (Bt) and surveys on foot (F).

| Zone | Winter | Spring | Summer | Autumn |
| --- | --- | --- | --- | --- |
| 1. Cap de Creus | P, Bt | Bt | P, Bt | P, Bt |
| 1. Roses Gulf | P, F | F | P, F | P, F |
| 1. Montgrí Coast | P, Bt | Bt | P, Bt | P, Bt |
| 1. Baix Ter | F | F | P, F | P, F |
| 1. Costa Brava | Bt | Bt | P, Bt | P, Bt |
| 1. Maresme | P | B | P, Bt | P, Bt |
| 1. Barcelonès | P | Bt | P, Bt | P, Bt |
| 1. Llobregat Delta | P, F | F | P, F | P, F |
| 1. Coast of Garraf and Baix Penedès | F | F | P, F | P, F |
| 1. Costa Daurada | P, Bt | Bt | P, Bt, F | P, F |
| 1. Ebro Delta | P | Bt | P, F | P, F |

**Text S1**

In the survey model, seasons were made to coincide with full months; this way winter was considered to span from January to March, spring from April to June, summer from July to September, and autumn from October to December. Sampling days within the seasons were semi-randomized (attributing a 70% chance to weekends and holidays and a 30% chance to weekdays). Port surveys (P) were aimed at interviewing boat users after they docked. Surveys done on foot (F) engaged shore fishers during the activity and spearfishers after the activity. Surveys done by boat (Bt) interviewed spearfishers in the water and shore fishers on the rocks during the activity. The original survey plan included 2 surveys per zone per season (one P and one Bt or F, depending on the zone). Since March 14th, Covid-19 mobility restrictions forced re-programming: Zones D, E, F, G, I and K each had one winter survey cancelled. During spring, all programmed P surveys were cancelled, and the B and F surveys were done exclusively during the month of June. Since the end of the restrictions, summer and autumn surveys were done without impediments. When possible, survey outings were repeated either when the number of responses in a survey outing were null or when no catches were reported. Additional extra days were allocated to the largest zones (I, J and K) when surveying days were available and none of the previous criteria were met. During winter, the Bt and P surveys in zones E and G were repeated before Covid-19 restrictions came into place. During summer, zones I, J and K had both their P and F surveys repeated, and an additional F survey was done in zone J (specifically to obtain results on shore fishing). During autumn, survey F was repeated in zone I; survey P was repeated in zone J, and surveys P and F were repeated in zone K.
